# Supplementary material for: Evaluation of DementiaNet, a network-based primary care innovation for community-dwelling patients with dementia: protocol for a longitudinal mixed methods multiple case study
Source: PubMed Central journal article supplement — BMJ Open. 2017 Aug 4;7(8):e016433. doi: 10.1136/bmjopen-2017-016433 (PMC5629707; doi:10.1136/bmjopen-2017-016433), 2017-08-04
Supplement: bmjopen-2017-016433.draft_revisions.pdf [file bmjopen-2017-016433.draft_revisions.pdf]

# BMJ Open

## Evaluation of DementiaNet, a network-based primary care innovation for community-dwelling dementia patients: protocol for a multiple case study

|                                 |                                                                                                                                                                                                                                                                                                                                                                                                                                                                                                                                                                                                                                                                                                                                                                                                                                                                                                                                                                                                                                                          |
|---------------------------------|----------------------------------------------------------------------------------------------------------------------------------------------------------------------------------------------------------------------------------------------------------------------------------------------------------------------------------------------------------------------------------------------------------------------------------------------------------------------------------------------------------------------------------------------------------------------------------------------------------------------------------------------------------------------------------------------------------------------------------------------------------------------------------------------------------------------------------------------------------------------------------------------------------------------------------------------------------------------------------------------------------------------------------------------------------|
| Journal:                        | <i>BMJ Open</i>                                                                                                                                                                                                                                                                                                                                                                                                                                                                                                                                                                                                                                                                                                                                                                                                                                                                                                                                                                                                                                          |
| Manuscript ID                   | bmjopen-2017-016433                                                                                                                                                                                                                                                                                                                                                                                                                                                                                                                                                                                                                                                                                                                                                                                                                                                                                                                                                                                                                                      |
| Article Type:                   | Protocol                                                                                                                                                                                                                                                                                                                                                                                                                                                                                                                                                                                                                                                                                                                                                                                                                                                                                                                                                                                                                                                 |
| Date Submitted by the Author:   | 14-Feb-2017                                                                                                                                                                                                                                                                                                                                                                                                                                                                                                                                                                                                                                                                                                                                                                                                                                                                                                                                                                                                                                              |
| Complete List of Authors:       | Richters, Anke; Radboud university medical center, Donders Institute for Brain Cognition and Behaviour, department of Geriatric medicine; Radboud university medical center, Radboud Alzheimer Centre<br>Nieuwboer, Minke; Radboud university medical center, Geriatric medicine; Radboud university medical center, Radboud Alzheimer Centre<br>Perry, Marieke; Radboud university medical center, Donders Institute for Brain Cognition and Behaviour, department of Geriatric medicine; Radboud university medical center, Radboud Alzheimer Centre<br>Olde Rikkert, Marcel; Radboud university medical center, Donders Institute for Brain Cognition and Behaviour, department of Geriatric medicine; Radboud university medical center, Radboud Alzheimer Centre<br>Melis, Rene; Radboud university medical center, Geriatric medicine; Radboud university medical center, Radboud Alzheimer Centre<br>van der Marck, Marjolein; Radboud university medical center, Geriatric medicine; Radboud university medical center, Radboud Alzheimer Centre |
| <b>Primary Subject Heading</b>: | Geriatric medicine                                                                                                                                                                                                                                                                                                                                                                                                                                                                                                                                                                                                                                                                                                                                                                                                                                                                                                                                                                                                                                       |
| Secondary Subject Heading:      | Health services research                                                                                                                                                                                                                                                                                                                                                                                                                                                                                                                                                                                                                                                                                                                                                                                                                                                                                                                                                                                                                                 |
| Keywords:                       | GERIATRIC MEDICINE, Dementia < NEUROLOGY, PRIMARY CARE                                                                                                                                                                                                                                                                                                                                                                                                                                                                                                                                                                                                                                                                                                                                                                                                                                                                                                                                                                                                   |
|                                 |                                                                                                                                                                                                                                                                                                                                                                                                                                                                                                                                                                                                                                                                                                                                                                                                                                                                                                                                                                                                                                                          |

SCHOLARONE™  
Manuscripts

1  
2  
3 **Evaluation of DementiaNet, a network-based primary care innovation for**  
4 **community-dwelling dementia patients: protocol for a multiple case study**  
5  
6

7 Anke Richters, MSc<sup>1,2</sup>  
8 Minke Nieuwboer, MSc<sup>2,3</sup>  
9 Marieke Perry, MD PhD<sup>1,2</sup>  
10 Marcel G.M. Olde Rikkert, MD PhD<sup>1,2</sup>  
11 Rene J.F. Melis, MD PhD<sup>2,3</sup>  
12 Marjolein A. van der Marck, PhD<sup>2,3</sup>  
13

14  
15 <sup>1</sup>Radboud university medical center, Donders Institute for Brain Cognition and Behaviour,  
16 Department of Geriatric Medicine, Nijmegen, The Netherlands

17 <sup>2</sup>Radboud university medical center, Radboudumc Alzheimer Centre, Nijmegen, The Netherlands

18 <sup>3</sup>Radboud university medical center, Department of Geriatric Medicine, Nijmegen, The Netherlands

19 <sup>4</sup>Radboud university medical center, Radboud Institute for Health Sciences, Department of Geriatric  
20 Medicine, Nijmegen, The Netherlands  
21

22 Corresponding author:

23 M.A. van der Marck  
24 Radboud university medical center  
25 PO 9101 (hp 925), 6500 HB Nijmegen, The Netherlands  
26 Telephone number: 0031 24 36 16772  
27 Fax number: 0031 24 36 17408  
28 Email: [Marjolein.vanderMarck@radboudumc.nl](mailto:Marjolein.vanderMarck@radboudumc.nl)  
29  
30  
31  
32  
33  
34  
35  
36  
37  
38  
39  
40  
41  
42  
43  
44  
45  
46  
47  
48  
49  
50  
51  
52  
53  
54  
55  
56  
57  
58  
59  
60

## Abstract

### Introduction:

Primary healthcare professionals will increasingly be required to manage and optimize their treatment for patients with dementia. With DementiaNet we aim to reduce the burden of dementia on health care services and society through implementation and facilitation of integrated network-based care with increased dementia expertise. DementiaNet is designed as a stepwise approach including clinical leadership, quality improvement cycles and inter-professional training, which are tailor-made to the local context. For example, the composition of the network and improvement goals are tailored to the local context and availability. Here, we describe the linked evaluation study which aims to provide insight in effectiveness, process and mechanism of the DementiaNet approach through an innovative evaluation design.

### Methods and analysis:

We designed a longitudinal, mixed methods, multiple case study. Study population consists of two levels: (i) local DementiaNet networks of primary care professionals, and (ii) dyads of patients and informal caregivers who receive care from these networks. At the start and after 12 and 24 months, quantitative data is collected for each network on: level of network maturity, quality of care indicators, and outcomes reported by informal caregivers of dementia patients. We assess changes in networks over time and the association with quality of care and informal caregiver-reported outcomes. Throughout the study, logs about each network are registered. Additionally, in-depth interviews with network members and informal caregivers will provide insight in experiences and opinions regarding effects and mechanisms through which changes in quantitative outcomes are effectuated. Rich narratives will be constructed about the development of the local networks using collected data.

### Ethics and dissemination:

The study protocol was reviewed by the local medical ethics committee; formal judgment was not required (protocol number: 2015-2053). The findings of this study will be disseminated through peer-reviewed publications, conference presentations, and presentations for healthcare professionals where appropriate.

### **Strengths and limitations of this study**

- Primary care innovations are not always subjected to the right rigorous evaluation, especially if their complexity is at odds with the conceptual assumptions of the randomized, controlled experiment. This evaluation study adds to evidence-based health care, by employing research methods that help to understand not only whether DementiaNet is effective or not, but also focuses on why, how, and in which context certain outcomes can be expected. Therefore, comprehensive data collection is designed with quantitative and qualitative methods.
- The knowledge resulting from this longitudinal multiple case study emanates from theoretical generalizability rather than statistical generalizability, and may have great importance in allocating health care resources in such a way that patients benefit most.
- Quality indicators of care were derived based on widely supported primary care guidelines and were developed specifically for the current study to fit the innovation. Hence, these have not been employed in research before. Indicators will be reviewed for feasibility and reliability before final data analyses.
- The time span of the current evaluation study is likely too short to result in impacts on informal caregiver-reported outcomes; however, it may provide important data for further evaluation of DementiaNet with extended follow-up.

## Introduction

Health care needs of elderly are characterized by high prevalence of chronic conditions, multimorbidity and strong heterogeneity between individuals and over time.<sup>1</sup> As a result, numerous health and social caregivers are involved in care for this population. Additionally, over the last years, care systems and services have changed with a shift from long-term residential care facilities towards increased community-based care for elderly, resulting in increased requirements for primary care. Despite many initiatives, care arrangements are still sub-optimally designed to deal with the complexity of care, i.e. the large number of different available services, the involvement of many different professionals, and the accompanying lack of certainty and agreement about the best treatment plan. This has led to a lack of integration, coordination and continuity.<sup>2-5</sup> Possible explanations might be the facts that, in general, new guidelines are not fully taken up in clinical daily practice and are not adapted to each other, and improvement strategies merely target only parts of the system or aim at regional instead of local systems.

Community-dwelling dementia patients present an illustrative example of the challenges that are posed on complex chronic primary care. Firstly, much diversity exists in care needs since both the manifestation of dementia and the patients' social contexts are multiform. Secondly, many different primary care are involved from different health and social disciplines to provide care for dementia patients. This urges the need for a high level of collaboration, as clinical practice is still mainly characterized by ad hoc collaboration. Hence, re-organization of primary care is needed, in a way that is innovative, effective, scalable and also cost-effective.<sup>6</sup>

Both the necessity and possibility for improvement in primary care for dementia patients are evident, which led to the development of DementiaNet. This innovation aims at network-based care for community-dwelling dementia patients, following a stepwise, tailor-made approach. The innovation is integrated with a parallel running evaluation study which aims to assess implementation of DementiaNet in primary care, and to assess the merits and harms of this approach.

DementiaNet is complex in nature, as it alters a services delivery system with many different players involved and many external factors potentially influencing the pathways through which effects can be accomplished. The evaluation study, thus, has to fit the complexity of the healthcare innovation. In contrast to most medical and health care research where the influence of context is minimized, this is of particular interest in the evaluation of complex innovations. Therefore, research should not solely be aimed to answer the question of "does it work?", but should prioritize on how and why does it work.<sup>7</sup> Therefore, the current evaluation study aims to answer the following questions: what are the merits and drawbacks of the DementiaNet approach; how are these achieved; and which factors influence these processes? This paper describes the innovative methods used for the evaluation of DementiaNet along with background on these methods.

## Methods

### *DementiaNet innovation*

With DementiaNet we work towards high quality, network-based care which is organized on a local level with professionals from medical, care and social disciplines. DementiaNet aims to optimize care processes and outcomes, both from a perspective of community-dwelling dementia patients and their informal caregivers, as well as from care professionals' perspective. This is pursued through multidisciplinary network-based care with a high level of collaboration. A tailor-made approach is employed to ensure fit to the large practice variation as seen in daily clinical practice.

DementiaNet encompasses the transition towards network-based care through practice facilitation.<sup>8</sup> These clinical networks are designed in primary care, and include professionals from multiple disciplines and from varying organizations. Hence, these networks include collaborations between individuals and organisations across institutional and professional boundaries. These clinical networks thereby ensure quality of and access to care for patients, including those who require coordination of care across a range of settings.<sup>9</sup> This is pursued through formation of networks of primary care professionals who jointly and locally provide care to a number of dementia patients, desirably including at least one professional of the medical (e.g. GP), care (e.g. community nurses or case managers) and welfare (i.e. social workers) discipline. Inclusion of healthcare professionals is adapted to local sources and needs. As a consequence, each network in the programme is different from another in terms of size, represented disciplines and starting level of collaboration and care. A baseline data collection assessment takes place to map the starting position of the network. This includes measurements regarding network members and their backgrounds as well as the quality of care in their network. Feedback of the findings in the baseline data collection is then provided to the networks. Local network meetings are scheduled which start by making several actions to improve dementia care. These goals and actions are part of the quality improvement cycle, which are tailor-made to each networks' specific situation. Tailoring the approach to fit their local diversity is key in this innovation.<sup>10</sup>

Each network will employ four key components that are central to the approach of DementiaNet. Primarily, it relies on network-based care. The professionals in the network generally share a caseload of patients, the majority of whom have multiple professionals involved, requiring structured and organized collaboration to ensure continuity in care.

Secondly, the network leader(s) take up a central role in the process. Their task is to connect all professionals in the network and to stimulate and facilitate collaboration and improvement actions. Specifically, there is a leadership support programme for network leaders to help them take up this role.

Thirdly, networks work through quality improvement cycles (Plan-Do-Check-Act, PDCA). This means that at the beginning of each PDCA cycle, a comprehensive assessment is performed to get an overview of the quality of care and their network characteristics. The network jointly identifies improvement goals based on this measurement and their own experiences. A plan is drawn up with specific actions, tasks and a timeframe to achieve their goals. At the end of the yearly cycle, another assessment is performed to evaluate improvement and to identify new goals.

The last key element has a facilitating function. Interprofessional training and practice-based learning are used to increase knowledge and competencies. The contents of these training and coaching sessions are tailored to each network's own goals, as they have different starting levels and different improvement goals. Preferably, the training topics are linked to the quality improvement cycles. Also team training sessions are applied to increase team coherence, with sufficient team working skills, attitudes and competencies in the individuals involved in the team. Furthermore, professionals from different networks can take part in other sessions that were planned for these groups together, to be able to learn from each other and from best practices. More detailed information on the development of the DementiaNet innovation are described elsewhere.<sup>11</sup>

### *Study design and population*

The evaluation study was designed as a longitudinal, mixed methods, multiple case study.<sup>12</sup> Each participating network serves as a case in this study. Networks will be followed over time. Quantitative data is collected at baseline and after every 12 months, with a maximum of three measurements within the current study period (January 2015 – July 2017). Qualitative data is collected throughout the course of the innovation programme to gain in-depth knowledge on processes and experiences of involved persons (i.e. care professionals, patients and informal caregivers). Triangulation of quantitative and qualitative data is used to strengthen insight in patterns.

The study population consists of two levels. The first level includes the local DementiaNet networks participating in the DementiaNet programme. The second level includes patients and informal caregivers who receive care from care professionals in these local networks.

### *Data collection*

We collect data from multiple sources to describe the networks and to measure outcomes. Firstly, for each network, data are documented by the research team regarding the number and discipline of professionals involved. Log documents are kept for each network kept with information on the process of network formation and actions taken before enrolment of networks into the programme, as well as specifics that may influence the way their network develops and is able to execute the quality improvement cycles. Of this log, a narrative is to be constructed about each network. Additionally, a yearly online questionnaire is distributed among network members, including instruments including their attitude towards health care teams<sup>13</sup> and dementia<sup>14</sup>, their perceived team skills<sup>15</sup> and enabling factors for collaboration<sup>16</sup>.

The following data is collected to assess the effects of the DementiaNet innovation on care processes and outcomes (Figure 1):

#### 1. Network maturity

Network maturity is defined as the level at which the care professionals operate as a network. To assess the starting level and changes over time, we use a model for integrated primary care called the 'Primary Care Maturity Model'<sup>17</sup>, which includes eight items in three domains: (1) person-focused care, population-focused care; (2) clinical integration, professional integration, organizational integration, system integration; and (3) functional integration and normative integration. Each item is rated on four defined levels, ranging from (1) ad hoc, through (2) defined, and (3) controlled, to (4) synchronized. By summing the scores on the eight domains, a global maturity score is derived for each network for each measurement point, reflecting their network functioning at each time.

The rating of network maturity will be based on qualitative data. Structured interviews will be held at each measurement point (baseline and after every 12 months) by an independent researcher. An interview guide is developed based on the content of the Primary Care Maturity Model. Interviews are recorded on audio tape and stored until the end of the evaluation study. At that point, another independent and blinded researcher, who is unfamiliar with the study design and networks in the programme, will be instructed to rate the eight aspects of the Primary Care Maturity Model based on the interview, to obtain the global score.

#### 2. Quality of care indicators

Quality of dementia care is assessed by means of quality indicators. The quality indicators are reported on by the local networks through a registration file. A composite score will be constructed of the indicator scores of the final quality indicators to obtain a single overall score reflecting the network's quality of care.

This set of quality indicators was developed by an expert panel consisting of a geriatrician, general practitioner, community nurse/researcher, primary care researcher, epidemiologist and geriatric researcher prior to the current study to fit this particular evaluation. As it regards an innovative services delivery approach, it therefore required different indicators than have already been

1  
2  
3 developed for primary care settings. First, a framework was drafted with the basic concepts of the  
4 DementiaNet innovation, which were translated into criteria and subsequently operationalized into  
5 indicators that care should meet. These were checked to comply with relevant current guidelines and  
6 agreements regarding primary dementia care. Consensus on thirteen final indicators was reached  
7 after multiple meetings in which relevance and feasibility of indicators was reviewed, as well as the  
8 comprehensiveness of the total set. This set was tested for face validity, acceptability and perceived  
9 feasibility in a pilot survey among eighteen primary care professionals and showed good results on  
10 every aspect.

11 As these indicators have not been used before, they are subjected to additional assessment  
12 based on the baseline data before the actual analysis of the data. Assessment will ensure the use of  
13 only reliable indicators, for instance taking into account missingness, floor and ceiling effects and  
14 coherence with definitions. Therefore, the final set of indicators used in actual data analysis is  
15 expected to be more concise.

### 16 17 18 3. Informal caregiver-reported outcomes

19 Data on informal caregiver-reported outcomes are gathered through paper-and-pencil  
20 questionnaires. Patients are informed about the project and associated evaluation study through a  
21 letter from their general practitioner. This letter includes an answering card in which they can  
22 indicate whether they are interested in participation in an informal caregiver questionnaire. If so, the  
23 research team contacts them to obtain consent from informal caregiver and the patient where  
24 possible, and the postal address to send them the questionnaire. The informal caregiver  
25 questionnaire consists of demographic questions about the patient and informal caregiver, as well as  
26 validated instruments on several outcomes.  
27

### 28 29 4. Experiences and perspectives

30 In conjunction with the quantitative evaluation, a qualitative approach is employed. For this part of  
31 the evaluation study, we use in-depth semi-structured interviews with both care professionals in the  
32 networks as well as patients and informal caregivers. This data will provide insight in experiences and  
33 complex processes influencing potential results to be examined in the quantitative part. Interviews  
34 are held by a trained researcher, starting after the first year of the project. By purposive sampling of  
35 participants, we aim to include relevant perspectives from different disciplines of care professionals,  
36 as well as patients and their informal caregivers originating from different networks.  
37

### 38 39 *Analysis*

40 It is expected that this innovation has effects on multiple levels which may vary. Also, it is  
41 expected that the networks have different starting levels and divergent progression rates. Hence, the  
42 study considers both within and between network analyses, as follows.

43 Within each network, all data sources are conjoined in order to identify any changes resulting  
44 from the DementiaNet innovation. We look for patterns in trends over time in quantitative measures  
45 and we look for possible explanations for trends in activities carried out by the networks and their  
46 improvement goals. More specifically, we look into associations that follow from a hypothesized  
47 pathway of effects, where we expect that network maturity will increase over time, and will be  
48 associated with quality of care as measured by the quality indicators. Potentially, an increase in  
49 patient-reported outcomes will eventually follow the increases in quality of care.  
50

51 As the course of this innovation will proceed differently in each network, there will be a natural  
52 contrast between different networks with regards to the maturation into networks and the  
53 subsequent approach to care. Given the fact that these aspects are also monitored over time within  
54 each network, this will allow for cross-case comparisons. This approach has been used previously, for  
55 example on an integrated services delivery system in primary care for elderly, in which they  
56 monitored the degree of implementation of integrated services in a quantitative manner.<sup>18</sup> In  
57 outcome evaluation studies, such a quantification of implementation can be used as a measure of  
58  
59  
60

1  
2  
3 “dosage” of the intervention to be able to look for dose-response patterns to strengthen plausibility  
4 of found patterns.

5 By comparing cases (i.e. cross-case comparison) on the extent these have matured into a  
6 coordinated network and how much improvement efforts have been made and output (i.e. trends in  
7 quality of care and informal caregiver-reported outcomes), it will be possible to increase plausibility  
8 of causality to attribute changes to the DementiaNet innovation similar to a dose-response manner.

9 Furthermore, the qualitative data from the in-depth interviews will be used to explore  
10 experiences of professionals and patients and informal caregivers with the DementiaNet innovation.  
11 Analyses might explain results on effectiveness and give insight in mechanisms underlying (absence  
12 of) trends in the quantitative data, be supportive of causality of results by the DementiaNet  
13 innovation. Finally, the qualitative data could show any other intended or unintended results that are  
14 not captured in the quantitative data, since the qualitative data are gathered in an open and  
15 explorative manner.  
16  
17  
18  
19  
20  
21  
22  
23  
24  
25  
26  
27  
28  
29  
30  
31  
32  
33  
34  
35  
36  
37  
38  
39  
40  
41  
42  
43  
44  
45  
46  
47  
48  
49  
50  
51  
52  
53  
54  
55  
56  
57  
58  
59  
60



## Discussion

DementiaNet is an innovation that aims to tackle the current shortcomings in primary care for dementia patients by effectuating a transition from ad hoc collaboration towards more integrated network-based care with increased dementia expertise. With the current evaluation study we aim to provide insight in implementation of the DementiaNet innovation and its merits and harms by means of a longitudinal, mixed methods, multiple case study. Here, we will also take DementiaNet as an example of a complex intervention to elaborate further on the viewpoint that rigorous evaluation of these type of innovations in health services systems is essential and which considerations should be taken into account when designing such an evaluation study, to ensure adequate capturing of the complexity while achieving high external validity.

### *Rationale of the study*

Unlike clinical treatments, innovations in health services and primary care are not always subjected to rigorous evaluation.<sup>19-21</sup> Such evaluation studies add to evidence-based health care, which is essential in order to distinguish innovations that change health care organizations for the better, from those that lack beneficial effects. Such knowledge has great importance in allocating health care resources to spread innovations and ensure actual implementation.

Innovations in health services systems are often complex in terms of multiple components that interact, the number of involved professionals, the extent to which they have to alter their behaviours and the flexibility and tailoring necessary to fit the situation in which it is implemented<sup>22</sup>, which is particularly the case in the DementiaNet innovation. In such complex innovations, it is often difficult to accurately predict to what extent and through which pathways the intervention may affect outcomes, and how the context in which it is implemented influences these pathways. In other words, it is hardly possible to predict if and how health care innovations will lead to the intended outcomes.<sup>23,24</sup> Many examples exist of previous efforts in health care innovations that seemed promising but did not induce the desired changes, or even worsened outcomes or expenses<sup>25,26</sup>. For instance, interventions aimed at reduction of emergency admissions have failed to produce the desired outcomes or even produced counterproductive outcomes because several aspects had been ignored, such as alternative explanations, regression to the mean, and supply induced demand.<sup>27</sup> The degree of uncertainty in effective pathways through which interventions work and therefore the results they lead to, increases with a higher degree of complexity of health care change. In general, but especially in times of limited resources, it is of invaluable importance to evaluate innovations in health care services to know which ones are worth adopting and investing in.

### *Study design*

From the viewpoint that evaluation is indispensable, one inevitable choice is the optimal study design. From the perspective of traditional scientific (statistical) generalization, the highest form of evidence for efficacy of interventions comes from randomized clinical trials (RCTs). The key methodological components of an RCT are the use of a control group and random assignment to groups to balance distribution of potential confounders, to allow for causal inferences. These components ensure high internal validity, but often limit external validity. However, several differences are encountered between the evaluation of relatively simple (medical) interventions and of complex health care innovations. For instance, the nature and complexity of health services innovations often cause assumptions underlying the RCT design to not be upheld, therefore compromising internal validity of RCTs and thus advocating the use of alternative study designs.<sup>28</sup> The most often violated assumption is the assumption of context independence, but also the assumption of equipoise may not apply if preference for the intervention over usual care exists.

The DementiaNet innovation is complex on multiple aspects, according to definitions from the Medical Research Council (MRC)<sup>22,29</sup>: it consists of multiple interacting components; health care professionals have to alter their behaviours considerably; and multiple organizational levels are

1  
2  
3 targeted. Additionally, the innovation is tailored to the specific situation of each local network, which  
4 has been recognized as a logical fit for complex interventions to be adapted to local contexts rather  
5 than completely standardized.<sup>22</sup> Logically, the context in which the intervention is implemented is of  
6 great influence and therefore of interest to the evaluation. This will be taken into account by  
7 constructing narratives of each network with specific attention to their context and by looking for  
8 patterns in different contextual factors that may account for different trends in outcomes.

9 For these reasons, we designed the evaluation study as a longitudinal multiple case study.  
10 The unit of analysis is the individual network participating in the DementiaNet project. This makes it  
11 impossible to set up a comparable control unit, as these networks do not exist yet without the  
12 innovation. Additionally, necessary investment in data collection was not endorsed by professionals  
13 if participation in the project was not ensured. In case studies, the context is explicitly taken into  
14 account as part of the evaluation, in contrast to experimental designs which employ the opposite  
15 approach by controlling the context as much as possible.<sup>12</sup> Therefore, a multiple case study is found  
16 very suitable for this type of evaluation. In a multiple case study, each case can be seen as a single  
17 experiment. Hence, a multiple case study may then be considered the equivalent to multiple  
18 experiments. Under this assumption, generalizing from case studies can be equivalent to generalizing  
19 from experiments.<sup>12</sup> Inferences are drawn both from within-case changes over time and cross-case  
20 comparison. The longitudinal multiple case study design allows for the addition of this latter  
21 approach, thereby providing the potential to replicate findings and identify patterns, which increases  
22 explanatory power and generalizability of findings.<sup>30</sup>

23 Although there is a certain selection underlying the participating networks in the evaluation  
24 study, we believe that the results will extrapolate to other locations as well. This is assumed because  
25 the innovation is not specific to this innovators and early adopters group, but is applicable to every  
26 network as it is strongly tailor-made to the specific needs of every network. We will evaluate the  
27 suitability for networks that start at higher and lower levels of collaboration and quality, leading to  
28 higher external validity.

29 Each network is enrolled into the evaluation study as a case upon starting in the project.  
30 Hence, the evaluation study commences at the same time as the implementation of the innovation.  
31 This timing allows for the most optimal within-case comparison between the situation right before  
32 implementation started and during increasing levels of implementation within the network. This  
33 outweighs the fact that effects take time to develop and thus may not come to full fruition within the  
34 timeframe of the study in our opinion as it strongly increases the validity of inferences to be drawn  
35 from this evaluation.

#### 36 *Expectations*

37 Successful transition towards network care will be evidenced by an increase in the rating of  
38 network maturity. It is expected that this is not the case in all networks, as some probably fail to  
39 succeed in transitioning after the starting initiative to take part in the innovation, for instance  
40 because of organizational problems or because network leaders are unable to fulfil their role.  
41 Moreover, it is expected that rating of network functioning is associated with the score on quality of  
42 care as measured by indicators. Hence, we expect that quality of care scores will increase along with  
43 network functioning, although possibly with a considerable delay. It is not hypothesized that informal  
44 caregiver-reported outcomes will already be affected by the DementiaNet innovation in a way that is  
45 timely and strong enough to be picked up by this evaluation study. However, as it is an extension of  
46 the hypothesized pathway and the ultimate goal of many health services innovations, we do consider  
47 the inclusion of these outcomes relevant to incorporate the patient and informal caregiver's  
48 perspective to expand upon in further studies.

49 We expect that the mixed methods design provide us with insight in how the innovation  
50 actually was implemented in each network, how it worked and which contextual aspects influenced  
51 this. Furthermore, we expect information on which aspects of the innovation are most effective in  
52 which circumstances. Possibly, the innovation and future implementation can be improved with this  
53 information. Next to highly valuable data for effective and efficient network-based care for chronic  
54  
55  
56  
57  
58  
59  
60

1  
2  
3 conditions in older populations, starting with dementia care, this study may yield important  
4 methodological data on the value of a multiple case study analysis for other complex interventions as  
5 well.  
6

## 7 **Footnotes**

### 8 Funding

9  
10 This work is supported by Alzheimer Nederland (project number WE.09-2013-04) and Gieskes-Strijbis  
11 Fonds.  
12

### 13 Conflict of interest

14 All authors declare no conflict of interest.  
15  
16

### 17 Contributions

18 AR, MN, MP, MOR, RM and MvdM were involved in the design and planning of the study. AR and  
19 MvdM drafted the manuscript. MN, MP, MOR and RM edited and revised this manuscript. All authors  
20 agreed with the final version.  
21

### 22 Ethics approval

23 The study protocol was submitted for review to the medical ethics committee region Arnhem-  
24 Nijmegen, and they declared that formal judgment was not required (protocol number: 2015-2053).  
25  
26  
27  
28  
29  
30  
31  
32  
33  
34  
35  
36  
37  
38  
39  
40  
41  
42  
43  
44  
45  
46  
47  
48  
49  
50  
51  
52  
53  
54  
55  
56  
57  
58  
59  
60

1  
2  
3  
4  
5  
6  
7  
8  
9  
10  
11  
12  
13  
14  
15  
16  
17  
18  
19  
20  
21  
22  
23  
24  
25  
26  
27  
28  
29  
30  
31  
32  
33  
34  
35  
36  
37  
38  
39  
40  
41  
42  
43  
44  
45  
46  
47  
48  
49  
50  
51  
52  
53  
54  
55  
56  
57  
58  
59  
60

**Figure 1: Overview of data collection for the evaluation of the DementiaNet innovation**

[fig 1]

*§: continuous collection of data; †: data collected at start and after 12 and 24 months; ‡: data collected at one time point in a selected number of networks*

For peer review only

**References:**

1. Adams WL, McIlvain HE, Lacy NL, et al. Primary care for elderly people: why do doctors find it so hard? *The Gerontologist* 2002;**42**(6):835-42.
2. Bergman H, Beland F, Lebel P, et al. Care for Canada's frail elderly population: fragmentation or integration? *Canadian Medical Association journal* 1997;**157**(8):1116-21.
3. Stange KC. The problem of fragmentation and the need for integrative solutions. *Annals of family medicine* 2009;**7**(2):100-3.
4. Holman H, Lorig K. Patient self-management: a key to effectiveness and efficiency in care of chronic disease. *Public health reports (Washington, DC : 1974)* 2004;**119**(3):239-43.
5. MacNeil Vroomen J, Van Mierlo LD, van de Ven PM, et al. Comparing Dutch case management care models for people with dementia and their caregivers: The design of the COMPAS study. *BMC health services research* 2012;**12**:132.
6. Goodwin N. How should integrated care address the challenge of people with complex health and social care needs? Emerging lessons from international case studies. *International journal of integrated care* 2015;**15**:e037.
7. Pawson R, Greenhalgh T, Harvey G, et al. Realist review--a new method of systematic review designed for complex policy interventions. *Journal of health services research & policy* 2005;**10 Suppl 1**:21-34.
8. Parchman ML, Noel PH, Culler SD, et al. A randomized trial of practice facilitation to improve the delivery of chronic illness care in primary care: initial and sustained effects. *Implementation science : IS* 2013;**8**:93.
9. Brown BB, Patel C, McInnes E, et al. The effectiveness of clinical networks in improving quality of care and patient outcomes: a systematic review of quantitative and qualitative studies. *BMC health services research* 2016;**16**:360.
10. Hawe P, Shiell A, Riley T. Complex interventions: how "out of control" can a randomised controlled trial be? *BMJ (Clinical research ed)* 2004;**328**(7455):1561-3.
11. Nieuwboer MS, Richters A, van der Marck MA. Triple aim improvement for individuals, services and society in dementia care: the DementiaNet collaborative care approach. *Zeitschrift für Gerontologie und Geriatrie* 2017.
12. Yin RK. Enhancing the quality of case studies in health services research. *Health services research* 1999;**34**(5 Pt 2):1209-24.
13. Heinemann GD, Schmitt MH, Farrell MP, et al. Development of an Attitudes Toward Health Care Teams Scale. *Evaluation & the health professions* 1999;**22**(1):123-42.
14. Turner S, Iliffe S, Downs M, et al. General practitioners' knowledge, confidence and attitudes in the diagnosis and management of dementia. *Age and ageing* 2004;**33**(5):461-7.
15. Hyer K, Heinemann GD, Fulmer T. Team Skills Scale. *Team Performance in Health Care: Assessment and Development*. New York: Plenum, 2002:159-63.
16. D'Amour D, Goulet L, Labadie JF, et al. A model and typology of collaboration between professionals in healthcare organizations. *BMC health services research* 2008;**8**:188.
17. Valentijn PP, Vrijhoef HJ, Ruwaard D, et al. Towards an international taxonomy of integrated primary care: a Delphi consensus approach. *BMC family practice* 2015;**16**:64.
18. Hebert R, Veil A. Monitoring the degree of implementation of an integrated delivery system. *International journal of integrated care* 2004;**4**:e05.
19. Macleod MR, Michie S, Roberts I, et al. Biomedical research: increasing value, reducing waste. *Lancet (London, England)* 2014;**383**(9912):101-4.
20. Ioannidis JP, Greenland S, Hlatky MA, et al. Increasing value and reducing waste in research design, conduct, and analysis. *Lancet (London, England)* 2014;**383**(9912):166-75.
21. Greenhalgh T, Howick J, Maskrey N. Evidence based medicine: a movement in crisis? *BMJ (Clinical research ed)* 2014;**348**:g3725.

22. Craig P, Dieppe P, Macintyre S, et al. Developing and evaluating complex interventions: the new Medical Research Council guidance. *International journal of nursing studies* 2013;**50**(5):587-92.
23. Snowden DJ, Boone ME. A leader's framework for decision making. *A leader's framework for decision making. Harv Bus Rev* 2007;**85**(11):68-76, 149.
24. Leykum LK, Lanham HJ, Pugh JA, et al. Manifestations and implications of uncertainty for improving healthcare systems: an analysis of observational and interventional studies grounded in complexity science. *Implementation science : IS* 2014;**9**:165.
25. Lamont T, Barber N, Pury J, et al. New approaches to evaluating complex health and care systems. *BMJ (Clinical research ed)* 2016;**352**:i154.
26. Timbie JW, Fox DS, Van Busum K, et al. Five reasons that many comparative effectiveness studies fail to change patient care and clinical practice. *Health affairs (Project Hope)* 2012;**31**(10):2168-75.
27. Roland M, Abel G. Reducing emergency admissions: are we on the right track? *BMJ (Clinical research ed)* 2012;**345**:e6017.
28. Walach H, Falkenberg T, Fonnebo V, et al. Circular instead of hierarchical: methodological principles for the evaluation of complex interventions. *BMC medical research methodology* 2006;**6**:29.
29. Craig P, Dieppe P, Macintyre S, et al. Developing and evaluating complex interventions: the new Medical Research Council guidance. *BMJ (Clinical research ed)* 2008;**337**:a1655.
30. Yin RK. *Applications of case study research*. 3rd edition ed: SAGE Publications, Inc. , 2012.
31. Scholzel-Dorenbos CJ, Arons AM, Wammes JJ, et al. Validation study of the prototype of a disease-specific index measure for health-related quality of life in dementia. *Health and quality of life outcomes* 2012;**10**:118.
32. Makai P, Koopmanschap MA, Brouwer WB, et al. A validation of the ICECAP-O in a population of post-hospitalized older people in the Netherlands. *Health and quality of life outcomes* 2013;**11**:57.
33. Gagnon M, Hebert R, Dube M, et al. Development and validation of the Health Care Satisfaction Questionnaire (HCSQ) in elders. *Journal of nursing measurement* 2006;**14**(3):190-204.
34. Gagnon M, Hibert R, Dube M, et al. Development and validation of an instrument measuring individual empowerment in relation to personal health care: the Health Care Empowerment Questionnaire (HCEQ). *American journal of health promotion : AJHP* 2006;**20**(6):429-35.
35. de Jonghe JF, Kat MG, Kalisvaart CJ, et al. [Neuropsychiatric inventory questionnaire (NPI-Q): A validity study of the Dutch form]. *Tijdschrift voor gerontologie en geriatrie* 2003;**34**(2):74-7.
36. Brouwer WB, van Exel NJ, van Gorp B, et al. The CarerQol instrument: a new instrument to measure care-related quality of life of informal caregivers for use in economic evaluations. *Quality of life research : an international journal of quality of life aspects of treatment, care and rehabilitation* 2006;**15**(6):1005-21.
37. Hoefman RJ, van Exel J, Rose JM, et al. A discrete choice experiment to obtain a tariff for valuing informal care situations measured with the CarerQol instrument. *Medical decision making : an international journal of the Society for Medical Decision Making* 2014;**34**(1):84-96.
38. Kraijo H, van Exel J, Brouwer W. The perseverance time of informal carers for people with dementia: results of a two-year longitudinal follow-up study. *BMC nursing* 2015;**14**:56.
39. Richters A, Olde Rikkert MG, van Exel NJ, et al. Perseverance Time of Informal Caregivers for Institutionalized Elderly: Construct Validity and Test-Retest Reliability of a Single-Question Instrument. *Journal of the American Medical Directors Association* 2016;**17**(8):761-2.
40. Richters A, Melis RJ, Olde Rikkert MG, et al. The International Dementia Alliance Instrument for Feasible and Valid Staging of Individuals with Dementia by Informal Caregivers. *Journal of the American Geriatrics Society* 2016.

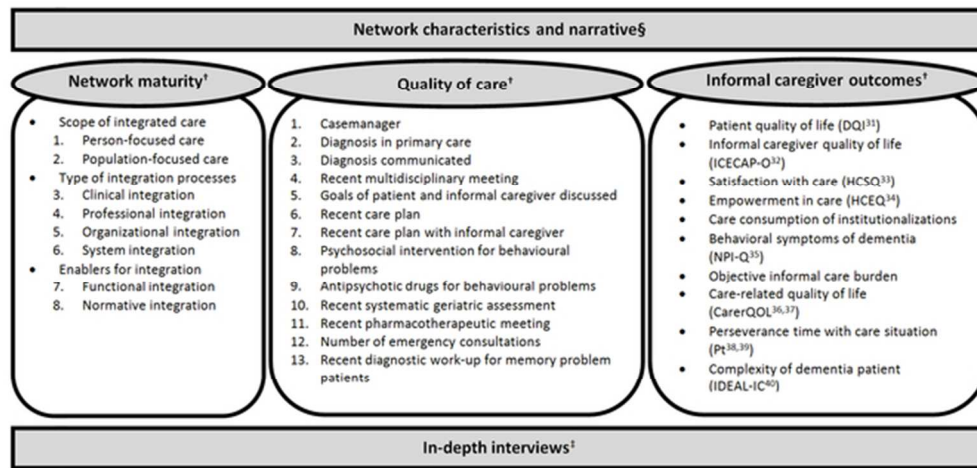

Caption:  
Figure 1: Overview of data collection for the evaluation of the DementiaNet innovation

Legend:  
§: continuous collection of data; †: data collected at start and after 12 and 24 months; ‡: data collected at one time point in a selected number of networks

28x13mm (600 x 600 DPI)

Review only

# BMJ Open

## Evaluation of DementiaNet, a network-based primary care innovation for community-dwelling dementia patients: protocol for a longitudinal mixed methods multiple case study

|                                 |                                                                                                                                                                                                                                                                                                                                                                                                                                                                                                                                                                                                                                                                                                                                                                                                                                                                                                                                                                                                                                                          |
|---------------------------------|----------------------------------------------------------------------------------------------------------------------------------------------------------------------------------------------------------------------------------------------------------------------------------------------------------------------------------------------------------------------------------------------------------------------------------------------------------------------------------------------------------------------------------------------------------------------------------------------------------------------------------------------------------------------------------------------------------------------------------------------------------------------------------------------------------------------------------------------------------------------------------------------------------------------------------------------------------------------------------------------------------------------------------------------------------|
| Journal:                        | <i>BMJ Open</i>                                                                                                                                                                                                                                                                                                                                                                                                                                                                                                                                                                                                                                                                                                                                                                                                                                                                                                                                                                                                                                          |
| Manuscript ID                   | bmjopen-2017-016433.R1                                                                                                                                                                                                                                                                                                                                                                                                                                                                                                                                                                                                                                                                                                                                                                                                                                                                                                                                                                                                                                   |
| Article Type:                   | Protocol                                                                                                                                                                                                                                                                                                                                                                                                                                                                                                                                                                                                                                                                                                                                                                                                                                                                                                                                                                                                                                                 |
| Date Submitted by the Author:   | 18-Apr-2017                                                                                                                                                                                                                                                                                                                                                                                                                                                                                                                                                                                                                                                                                                                                                                                                                                                                                                                                                                                                                                              |
| Complete List of Authors:       | Richters, Anke; Radboud university medical center, Donders Institute for Brain Cognition and Behaviour, department of Geriatric medicine; Radboud university medical center, Radboud Alzheimer Centre<br>Nieuwboer, Minke; Radboud university medical center, Geriatric medicine; Radboud university medical center, Radboud Alzheimer Centre<br>Perry, Marieke; Radboud university medical center, Donders Institute for Brain Cognition and Behaviour, department of Geriatric medicine; Radboud university medical center, Radboud Alzheimer Centre<br>Olde Rikkert, Marcel; Radboud university medical center, Donders Institute for Brain Cognition and Behaviour, department of Geriatric medicine; Radboud university medical center, Radboud Alzheimer Centre<br>Melis, Rene; Radboud university medical center, Geriatric medicine; Radboud university medical center, Radboud Alzheimer Centre<br>van der Marck, Marjolein; Radboud university medical center, Geriatric medicine; Radboud university medical center, Radboud Alzheimer Centre |
| <b>Primary Subject Heading</b>: | Geriatric medicine                                                                                                                                                                                                                                                                                                                                                                                                                                                                                                                                                                                                                                                                                                                                                                                                                                                                                                                                                                                                                                       |
| Secondary Subject Heading:      | Health services research                                                                                                                                                                                                                                                                                                                                                                                                                                                                                                                                                                                                                                                                                                                                                                                                                                                                                                                                                                                                                                 |
| Keywords:                       | GERIATRIC MEDICINE, Dementia < NEUROLOGY, PRIMARY CARE                                                                                                                                                                                                                                                                                                                                                                                                                                                                                                                                                                                                                                                                                                                                                                                                                                                                                                                                                                                                   |
|                                 |                                                                                                                                                                                                                                                                                                                                                                                                                                                                                                                                                                                                                                                                                                                                                                                                                                                                                                                                                                                                                                                          |

SCHOLARONE™  
Manuscripts



1  
2  
3 **Evaluation of DementiaNet, a network-based primary care innovation for**  
4 **community-dwelling dementia patients: protocol for a longitudinal mixed**  
5 **methods multiple case study**  
6  
7

8 Anke Richters, MSc<sup>1,2</sup>

9 Minke Nieuwboer, MSc<sup>2,3</sup>

10 Marieke Perry, MD PhD<sup>1,2</sup>

11 Marcel G.M. Olde Rikkert, MD PhD<sup>1,2</sup>

12 Rene J.F. Melis, MD PhD<sup>2,3</sup>

13 Marjolein A. van der Marck, PhD<sup>2,3</sup>  
14  
15

16 <sup>1</sup>Radboud university medical center, Donders Institute for Brain Cognition and Behaviour,  
17 Department of Geriatric Medicine, Nijmegen, The Netherlands

18 <sup>2</sup>Radboud university medical center, Radboudumc Alzheimer Centre, Nijmegen, The Netherlands

19 <sup>3</sup>Radboud university medical center, Department of Geriatric Medicine, Nijmegen, The Netherlands

20 <sup>4</sup>Radboud university medical center, Radboud Institute for Health Sciences, Department of Geriatric  
21 Medicine, Nijmegen, The Netherlands  
22

23  
24 Corresponding author:

25 M.A. van der Marck

26 Radboud university medical center

27 PO 9101 (hp 925), 6500 HB Nijmegen, The Netherlands

28 Telephone number: 0031 24 36 16772

29 Fax number: 0031 24 36 17408

30 Email: [Marjolein.vanderMarck@radboudumc.nl](mailto:Marjolein.vanderMarck@radboudumc.nl)  
31  
32  
33  
34  
35  
36  
37  
38  
39  
40  
41  
42  
43  
44  
45  
46  
47  
48  
49  
50  
51  
52  
53  
54  
55  
56  
57  
58  
59  
60

## Abstract

### Introduction:

Primary healthcare professionals will increasingly be required to manage and optimize their treatment for patients with dementia. With DementiaNet we aim to reduce the burden of dementia on health care services and society through implementation and facilitation of integrated network-based care with increased dementia expertise. DementiaNet is designed as a stepwise approach including clinical leadership, quality improvement cycles and inter-professional training, which are tailor-made to the local context. For example, the composition of the network and improvement goals are tailored to the local context and availability. Here, we describe the linked evaluation study which aims to provide insight in effectiveness, process and mechanism of the DementiaNet approach through an innovative evaluation design.

### Methods and analysis:

We designed a longitudinal, mixed methods, multiple case study. Study population consists of two levels: (i) local DementiaNet networks of primary care professionals, and (ii) patients and informal caregivers who receive care from these networks. At the start and after 12 and 24 months, quantitative data is collected for each network on: level of network maturity, quality of care indicators, and outcomes reported by informal caregivers of dementia patients. We assess changes in networks over time and the association with quality of care and informal caregiver-reported outcomes. Throughout the study, logs about each network are registered. Additionally, semi-structured interviews with network members and informal caregivers will provide insight in experiences and opinions regarding effects and mechanisms through which changes in quantitative outcomes are effectuated. Rich narratives will be constructed about the development of the local networks using collected data.

### Ethics and dissemination:

The study protocol was reviewed by the local medical ethics committee; formal judgment was not required (protocol number: 2015-2053). The findings of this study will be disseminated through peer-reviewed publications, conference presentations, and presentations for healthcare professionals where appropriate.

### **Strengths and limitations of this study**

- Primary care innovations are not always subjected to the right rigorous evaluation, especially if their complexity is at odds with the conceptual assumptions of the randomized, controlled experiment. This evaluation study adds to evidence-based health care, by employing research methods that help to understand not only whether DementiaNet is effective or not, but also focuses on why, how, and in which context certain outcomes can be expected. Therefore, comprehensive data collection is designed with quantitative and qualitative methods.
- The knowledge resulting from this longitudinal multiple case study emanates from theoretical generalizability rather than statistical generalizability, and may have great importance in allocating health care resources in such a way that patients benefit most.
- Quality indicators of care were derived based on widely supported primary care guidelines and were developed specifically for the current study to fit the innovation. Hence, these have not been employed in research before. Indicators' face validity has been established and will be reviewed for feasibility and reliability before final data analyses.
- The time span of the current evaluation study is likely too short to result in impacts on informal caregiver-reported outcomes; however, it may provide important data for further evaluation of DementiaNet with extended follow-up.

## Introduction

Health care needs of elderly are characterized by high prevalence of chronic conditions, multimorbidity and strong heterogeneity between individuals and over time.<sup>1</sup> As a result, numerous health and social caregivers are involved in care for this population. Additionally, over the last years, care systems and services have changed with a shift from long-term residential care facilities towards increased community-based care for elderly, resulting in increased requirements for primary care. Despite many initiatives, care arrangements are still sub-optimally designed to deal with the complexity of care, i.e. the large number of different available services, the involvement of many different professionals, and the accompanying lack of certainty and agreement about the best treatment plan. This has led to a lack of integration, coordination and continuity.<sup>2-5</sup> Possible explanations might be the facts that, in general, new guidelines are not fully taken up in clinical daily practice and are not adapted to each other, and improvement strategies merely target only parts of the system or aim at regional instead of local systems.

Community-dwelling dementia patients present an illustrative example of the challenges that are posed on complex chronic primary care. Firstly, much diversity exists in care needs since both the manifestation of dementia and the patients' social contexts are multiform. Secondly, many different primary care professionals are involved from different health and social disciplines to provide care for dementia patients. This urges the need for a high level of collaboration, as clinical practice is still mainly characterized by ad hoc collaboration. Hence, re-organization of primary care is needed, in a way that is innovative, effective, scalable and also cost-effective.<sup>6</sup> An overview of usual care is provided in Box 1.

Education alone is insufficient to improve primary dementia care.<sup>7</sup> Also, interventions targeted at improving casemanagement, a crucial factor in primary dementia care, show limited improvements on outcomes such as caregiver burden<sup>8</sup> or care needs and quality of life<sup>5</sup>. Another UK-based analysis showed disappointing results from efforts on dementia recognition, diagnosis and management.<sup>9,10</sup> In contrast, innovations aimed at a more comprehensive system, such as the PRISMA model for integrated service delivery system for frail older people in Canada, were positively evaluated on several relevant outcomes such as functional decline rate and unmet care needs.<sup>11</sup> Another intervention study that targets dementia management in primary care as a whole, the Delphi study in Germany, shows promising preliminary results (on GP attitude and caregiver burden)<sup>12</sup> but is yet to publish the overall results.

Both the necessity and possibility for improvement in primary care for dementia patients are evident, which led to the development of DementiaNet. This innovation aims at network-based care for community-dwelling dementia patients, following a stepwise, tailor-made approach. The innovation is integrated with a parallel running evaluation study which aims to assess implementation of DementiaNet in primary care, and to assess the merits and harms of this approach.

DementiaNet is complex in nature, as it alters a services delivery system with many different players involved and many external factors potentially influencing the pathways through which effects can be accomplished. The evaluation study, thus, has to fit the complexity of the healthcare innovation. In contrast to most medical and health care research where the influence of context is minimized, this is of particular interest in the evaluation of complex innovations. Therefore, research should not solely be aimed to answer the question of "does it work?", but should prioritize on how and why does it work.<sup>13</sup> Therefore, the current evaluation study aims to answer the following questions: what are the merits and drawbacks of the DementiaNet approach; how are these achieved; and which factors influence these processes? This paper describes the innovative methods used for the evaluation of DementiaNet along with background on these methods.

## Methods

### *DementiaNet innovation*

With DementiaNet we work towards high quality, network-based care which is organized on a local level with professionals from medical, care and social disciplines. DementiaNet aims to optimize care processes and outcomes, both from a perspective of community-dwelling dementia patients and their informal caregivers, as well as from care professionals' perspective. This is pursued through multidisciplinary network-based care with a high level of collaboration. A tailor-made approach is employed to ensure fit to the large practice variation as seen in daily clinical practice.

DementiaNet encompasses the transition towards network-based care through practice facilitation.<sup>14</sup> These clinical networks are designed in primary care, and include professionals from multiple disciplines and from varying organizations. Hence, these networks include collaborations between individuals and organisations across institutional and professional boundaries. These clinical networks thereby ensure quality of and access to care for patients, including those who require coordination of care across a range of settings.<sup>15</sup> This is pursued through formation of networks of primary care professionals who jointly and locally provide care to a number of dementia patients, desirably including at least one professional of the medical (e.g. GP), care (e.g. community nurses or case managers) and welfare (i.e. social workers) discipline. Inclusion of healthcare professionals is adapted to local sources and needs. As a consequence, each network in the programme is different from another in terms of size, represented disciplines and starting level of collaboration and care. A baseline data collection assessment takes place to map the starting position of the network. This includes measurements regarding network members and their backgrounds as well as the quality of care in their network. Feedback of the findings in the baseline data collection is then provided to the networks. Local network meetings are scheduled which start by making several actions to improve dementia care. These goals and actions are part of the quality improvement cycle, which are tailor-made to each networks' specific situation. Tailoring the approach to fit their local diversity is key in this innovation.<sup>16</sup>

Each network will employ four key components that are central to the approach of DementiaNet. Primarily, it relies on network-based care. The professionals in the network generally share a caseload of patients, the majority of whom have multiple professionals involved, requiring structured and organized collaboration to ensure continuity in care.

Secondly, the network leader(s) take up a central role in the process. Their task is to connect all professionals in the network and to stimulate and facilitate collaboration and improvement actions. Specifically, there is a leadership support programme for network leaders to help them take up this role.

Thirdly, networks work through quality improvement cycles (Plan-Do-Check-Act, PDCA). This means that at the beginning of each PDCA cycle, a comprehensive assessment is performed to get an overview of the quality of care and their network characteristics. The network jointly identifies improvement goals based on this measurement and their own experiences. A plan is drawn up with specific actions, tasks and a timeframe to achieve their goals. At the end of the yearly cycle, another assessment is performed to evaluate improvement and to identify new goals.

The last key element has a facilitating function. Interprofessional training and practice-based learning are used to increase knowledge and competencies. The contents of these training and coaching sessions are tailored to each network's own goals, as they have different starting levels and different improvement goals. Preferably, the training topics are linked to the quality improvement cycles. Also team training sessions are applied to increase team coherence, with sufficient team working skills, attitudes and competencies in the individuals involved in the team. Furthermore, professionals from different networks can take part in other sessions that were planned for these groups together, to be able to learn from each other and from best practices. More detailed information on the development of the DementiaNet innovation are described elsewhere.<sup>17</sup>

### *Study design and population*

1  
2  
3 The evaluation study is designed as a longitudinal, mixed methods, multiple case study.<sup>18</sup>  
4 Each participating network serves as a case in this study. Networks will be followed over time.  
5 Quantitative data will be collected at baseline and after every 12 months, with a maximum of three  
6 measurements within the current study period (January 2015 – July 2017). Qualitative data will be  
7 collected throughout the course of the innovation programme to gain in-depth knowledge on  
8 processes and experiences of involved persons (i.e. care professionals, patients and informal  
9 caregivers). Triangulation of quantitative and qualitative data will be used to strengthen insight in  
10 patterns.

11 The study population consists of two levels. The first level includes the local DementiaNet  
12 networks participating in the DementiaNet programme. The second level includes patients and  
13 informal caregivers who receive care from care professionals in these local networks.  
14

#### 15 *Data collection*

16 We will collect data from multiple sources to describe the networks and to measure  
17 outcomes. Firstly, for each network, data will be documented by the research team regarding the  
18 number and discipline of professionals involved. Log documents will be kept for each network kept  
19 with information on the process of network formation and actions taken before enrolment of  
20 networks into the programme, as well as specifics that may influence the way their network develops  
21 and is able to execute the quality improvement cycles. Of this log, a narrative is to be constructed  
22 about each network. Additionally, a yearly online questionnaire will be distributed among network  
23 members, including instruments including their attitude towards health care teams<sup>19</sup> and dementia<sup>20</sup>,  
24 their perceived team skills<sup>21</sup> and enabling factors for collaboration<sup>22</sup>.  
25  
26

27  
28 The following data will be collected to assess the effects of the DementiaNet innovation on care  
29 processes and outcomes (Figure 1):

##### 30 1. Network maturity

31 Network maturity is defined as the level at which the care professionals operate as a network. To  
32 assess the starting level and changes over time, we will use a model for integrated primary care  
33 called the 'Primary Care Maturity Model'<sup>23</sup>, which includes eight items in three domains: (1) person-  
34 focused care, population-focused care; (2) clinical integration, professional integration,  
35 organizational integration, system integration; and (3) functional integration, and normative  
36 integration. Each item is rated on four defined levels, ranging from (1) ad hoc, through (2) defined,  
37 and (3) controlled, to (4) synchronized. By summing the scores on the eight domains, a global  
38 maturity score will be derived for each network for each measurement point, reflecting their  
39 network functioning at each time.  
40

41 The rating of network maturity will be based on information obtained directly from the networks  
42 by means of interviews. Structured interviews with the network's leader(s) will be held at each  
43 measurement point (baseline and after every 12 months) by an independent researcher. An  
44 interview guide is developed based on the content of the Primary Care Maturity Model in such a way  
45 that sufficient information is obtained on each of the eight items to be scored. This approach is  
46 chosen in order to allow a certain degree of flexibility to each networks composition and context,  
47 while still targeting the specific topics to be scored. Interviews are recorded on audio tape and stored  
48 until the end of the evaluation study. At that point, another independent and blinded researcher,  
49 who is unfamiliar with the study design and networks in the programme, will be instructed to rate  
50 the eight aspects of the Primary Care Maturity Model based on the information in the interview, to  
51 obtain the global network maturity score.  
52

##### 53 2. Quality of care indicators

54 Quality of dementia care will be assessed by means of quality indicators. The quality indicators will  
55 be reported on by the local networks through a registration file. A composite score will be  
56 constructed of the indicator scores of the final quality indicators to obtain a single overall score  
57 reflecting the network's quality of care.  
58  
59  
60

1  
2  
3 This set of quality indicators was developed by an expert panel consisting of a geriatrician, general  
4 practitioner, community nurse/researcher, primary care researcher, epidemiologist and geriatric  
5 researcher prior to the current study to fit this particular evaluation. As it regards an innovative  
6 services delivery approach, it therefore required different indicators than have already been  
7 developed for primary care settings. First, a framework was drafted with the basic concepts of the  
8 DementiaNet innovation, which were translated into criteria and subsequently operationalized into  
9 indicators that care should meet. These were checked to comply with relevant current guidelines and  
10 agreements regarding primary dementia care. Consensus on thirteen final indicators was reached  
11 after multiple meetings in which relevance and feasibility of indicators was reviewed, as well as the  
12 comprehensiveness of the total set. This set was tested for face validity, acceptability and perceived  
13 feasibility in a pilot survey among eighteen primary care professionals and showed good results on  
14 every aspect.

15  
16 As these indicators have not been used before, they will be subjected to additional assessment  
17 based on the baseline data before the actual analysis of the data. Assessment will ensure the use of  
18 only reliable indicators, for instance taking into account missingness, floor and ceiling effects and  
19 coherence with definitions. Therefore, the final set of indicators used in actual data analysis is  
20 expected to be more concise.

### 21 22 3. Informal caregiver-reported outcomes

23 Data on informal caregiver-reported outcomes will be gathered through paper-and-pencil  
24 questionnaires. Patients will be informed about the project and associated evaluation study through  
25 a letter from their general practitioner. This letter includes an answering card in which they can  
26 indicate whether they are interested in participation in an informal caregiver questionnaire. If so, the  
27 research team will contact them to obtain consent from informal caregiver and the patient where  
28 possible, and the postal address to send them the questionnaire. The informal caregiver  
29 questionnaire consists of demographic questions about the patient and informal caregiver, as well as  
30 validated instruments on several outcomes (figure 1).

### 31 32 33 4. Experiences and perspectives

34 In conjunction with the quantitative evaluation, a qualitative approach will be employed. For this  
35 part of the evaluation study, we will use semi-structured interviews with both care professionals in  
36 the networks as well as patients and informal caregivers. This data will provide insight in experiences  
37 and complex processes influencing potential results to be examined in the quantitative part.  
38 Interviews will be held by a trained researcher, starting after the first year of the project. By  
39 purposive sampling of participants, we aim to include relevant perspectives from different disciplines  
40 of care professionals, as well as patients and their informal caregivers originating from different  
41 networks.

### 42 43 44 *Analysis*

45 It is expected that this innovation has effects on multiple levels which may vary. Also, it is  
46 expected that the networks have different starting levels and divergent progression rates. Hence, the  
47 study considers both within and between network analyses, as follows.

48 Within each network, all data sources will be conjoined in order to identify any changes  
49 resulting from the DementiaNet innovation. We will look for patterns in trends over time in  
50 quantitative measures and we look for possible explanations for trends in activities carried out by the  
51 networks and their improvement goals. More specifically, we will look into associations that follow  
52 from a hypothesized pathway of effects, where we expect that network maturity will increase over  
53 time, and will be associated with quality of care as measured by the quality indicators. Potentially, an  
54 increase in patient-reported outcomes will eventually follow the increases in quality of care. This will  
55 be analyzed by using mixed effects growth models to account for repeated measures and clustering  
56 of data within networks.  
57  
58  
59  
60

1  
2  
3 As the course of this innovation will proceed differently in each network, there will be a natural  
4 contrast between different networks with regards to the maturation into networks and the  
5 subsequent approach to care. Given the fact that these aspects will be also monitored over time  
6 within each network, this will allow for cross-case comparisons. This approach has been used  
7 previously, for example on an integrated services delivery system in primary care for elderly, in which  
8 they monitored the degree of implementation of integrated services in a quantitative manner.<sup>24</sup> In  
9 outcome evaluation studies, such a quantification of implementation can be used as a measure of  
10 “dosage” of the intervention to be able to look for dose-response patterns to strengthen plausibility  
11 of found patterns.

12 By comparing cases (i.e. cross-case comparison) on the extent these have matured into a  
13 coordinated network and how much improvement efforts have been made and output (i.e. trends in  
14 quality of care and informal caregiver-reported outcomes), it will be possible to increase plausibility  
15 of causality to attribute changes to the DementiaNet innovation similar to a dose-response manner.

16 Furthermore, the qualitative data from the semi-structured interviews will be used to explore  
17 experiences of professionals and patients and informal caregivers with the DementiaNet innovation.  
18 A thematic analysis will be used to analyze the verbatim transcripts of the semi-structured  
19 interviews. The analysis will be partly guided by a predetermined framework of potential experiences  
20 and perceived benefits based on the development of the innovation. We will remain open to  
21 discovering unanticipated nuances and topics in the data. Firstly, transcripts will be independently  
22 coded by two trained researchers. Subsequently, both coding schemes will be jointly reviewed to  
23 reach consensus about most appropriate coding. After that, codes will be categorized and major  
24 themes were identified by the same two researchers. Lastly, both researchers will independently  
25 draw overall findings from the codes in each category, after which a consensus round will be applied  
26 to these findings. Qualitative data analysis will be performed in Atlas.ti software.

27 The findings from these qualitative data will be conjointly used with the quantitative findings  
28 in the interpretation phase of the study in multiple manners: a) through triangulation, to corroborate  
29 findings and provide a stronger basis for conclusions, b) the qualitative findings will be used to  
30 augment quantitative findings, c) the qualitative findings will be used to identify unexpected and/or  
31 unintended effects that are not covered by the quantitative data.

## 32 Discussion

33 DementiaNet is an innovation that aims to tackle the current shortcomings in primary care  
34 for dementia patients by effectuating a transition from ad hoc collaboration towards more integrated  
35 network-based care with increased dementia expertise. With the current evaluation study we aim to  
36 provide insight in implementation of the DementiaNet innovation and its merits and harms by means  
37 of a longitudinal, mixed methods, multiple case study. Here, we will also take DementiaNet as an  
38 example of a complex intervention to elaborate further on the viewpoint that rigorous evaluation of  
39 these types of innovations in health services systems is essential and which considerations should be  
40 taken into account when designing such an evaluation study, to ensure adequate capturing of the  
41 complexity while achieving high external validity.

### 42 *Rationale of the study*

43 Unlike clinical treatments, innovations in health services and primary care are not always  
44 subjected to rigorous evaluation.<sup>25-27</sup> Such evaluation studies add to evidence-based health care,  
45 which is essential in order to distinguish innovations that change health care organizations for the  
46 better, from those that lack beneficial effects. Such knowledge has great importance in allocating  
47 health care resources to spread innovations and ensure actual implementation.

48 Innovations in health services systems are often complex in terms of multiple components  
49 that interact, the number of involved professionals, the extent to which they have to alter their  
50 behaviours and the flexibility and tailoring necessary to fit the situation in which it is implemented<sup>28</sup>,  
51 which is particularly the case in the DementiaNet innovation. In such complex innovations, it is often  
52 difficult to accurately predict to what extent and through which pathways the intervention may  
53  
54  
55  
56  
57  
58  
59  
60

1  
2  
3 affect outcomes, and how the context in which it is implemented influences these pathways. In other  
4 words, it is hardly possible to predict if and how health care innovations will lead to the intended  
5 outcomes.<sup>29 30</sup> Many examples exist of previous efforts in health care innovations that seemed  
6 promising but did not induce the desired changes, or even worsened outcomes or expenses<sup>31 32</sup>. For  
7 instance, interventions aimed at reduction of emergency admissions have failed to produce the  
8 desired outcomes or even produced counterproductive outcomes because several aspects had been  
9 ignored, such as alternative explanations, regression to the mean, and supply induced demand.<sup>33</sup> The  
10 degree of uncertainty in effective pathways through which interventions work and therefore the  
11 results they lead to, increases with a higher degree of complexity of health care change. In general,  
12 but especially in times of limited resources, it is of invaluable importance to evaluate innovations in  
13 health care services to know which ones are worth adopting and investing in.  
14

### 15 *Study design*

16 From the viewpoint that evaluation is indispensable, one inevitable choice is the optimal  
17 study design. From the perspective of traditional scientific (statistical) generalization, the highest  
18 form of evidence for efficacy of interventions comes from randomized clinical trials (RCTs). The key  
19 methodological components of an RCT are the use of a control group and random assignment to  
20 groups to balance distribution of potential confounders, to allow for causal inferences. These  
21 components ensure high internal validity, but often limit external validity. However, several  
22 differences are encountered between the evaluation of relatively simple (medical) interventions and  
23 of complex health care innovations. For instance, the nature and complexity of health services  
24 innovations often cause assumptions underlying the RCT design to not be upheld, therefore  
25 compromising internal validity of RCTs and thus advocating the use of alternative study designs.<sup>34</sup>  
26 The most often violated assumption is the assumption of context independence, but also the  
27 assumption of equipoise may not apply if preference for the intervention over usual care exists.  
28

29 The DementiaNet innovation is complex on multiple aspects, according to definitions from  
30 the Medical Research Council (MRC)<sup>28 35</sup>: it consists of multiple interacting components; health care  
31 professionals have to alter their behaviours considerably; and multiple organizational levels are  
32 targeted. Additionally, the innovation is tailored to the specific situation of each local network, which  
33 has been recognized as a logical fit for complex interventions to be adapted to local contexts rather  
34 than completely standardized.<sup>28</sup> Logically, the context in which the intervention is implemented is of  
35 great influence and therefore of interest to the evaluation. This will be taken into account by  
36 constructing narratives of each network with specific attention to their context and by looking for  
37 patterns in different contextual factors that may account for different trends in outcomes.  
38

39 For these reasons, we designed the evaluation study as a longitudinal multiple case study.  
40 The unit of analysis is the individual network participating in the DementiaNet project. This makes it  
41 impossible to set up a comparable control unit, as these networks do not exist yet without the  
42 innovation. Additionally, necessary investment in data collection was not endorsed by professionals  
43 if participation in the project was not ensured. In case studies, the context is explicitly taken into  
44 account as part of the evaluation, in contrast to experimental designs which employ the opposite  
45 approach by controlling the context as much as possible.<sup>18</sup> Therefore, a multiple case study is found  
46 very suitable for this type of evaluation. In a multiple case study, each case can be seen as a single  
47 experiment. Hence, a multiple case study may then be considered the equivalent to multiple  
48 experiments. Under this assumption, generalizing from case studies can be equivalent to generalizing  
49 from experiments.<sup>18</sup> Inferences are drawn both from within-case changes over time and cross-case  
50 comparison. The longitudinal multiple case study design allows for the addition of this latter  
51 approach, thereby providing the potential to replicate findings and identify patterns, which increases  
52 explanatory power and generalizability of findings.<sup>36</sup>  
53

54 Although there is a certain selection underlying the participating networks in the evaluation  
55 study, we believe that the results will extrapolate to other locations as well. This is assumed because  
56 the innovation is not specific to this innovators and early adopters group, but is applicable to every  
57 network as it is strongly tailor-made to the specific needs of every network. We will evaluate the  
58  
59  
60



1  
2  
3 suitability for networks that start at higher and lower levels of collaboration and quality, leading to  
4 higher external validity.

5 Each network is enrolled into the evaluation study as a case upon starting in the project.  
6 Hence, the evaluation study commences at the same time as the implementation of the innovation.  
7 This timing allows for the most optimal within-case comparison between the situation right before  
8 implementation started and during increasing levels of implementation within the network. This  
9 outweighs the fact that effects take time to develop and thus may not come to full fruition within the  
10 timeframe of the study in our opinion as it strongly increases the validity of inferences to be drawn  
11 from this evaluation.  
12

### 13 *Expectations*

14 Successful transition towards network care will be evidenced by an increase in the rating of  
15 network maturity. It is expected that this is not the case in all networks, as some probably fail to  
16 succeed in transitioning after the starting initiative to take part in the innovation, for instance  
17 because of organizational problems or because network leaders are unable to fulfil their role.  
18 Moreover, it is expected that rating of network functioning is associated with the score on quality of  
19 care as measured by indicators. Hence, we expect that quality of care scores will increase along with  
20 network functioning, although possibly with a considerable delay. It is not hypothesized that informal  
21 caregiver-reported outcomes will already be affected by the DementiaNet innovation in a way that is  
22 timely and strong enough to be picked up by this evaluation study. However, as it is an extension of  
23 the hypothesized pathway and the ultimate goal of many health services innovations, we do consider  
24 the inclusion of these outcomes relevant to incorporate the patient and informal caregiver's  
25 perspective to expand upon in further studies.  
26

27 We expect that the mixed methods design provide us with insight in how the innovation  
28 actually was implemented in each network, how it worked and which contextual aspects influenced  
29 this. Furthermore, we expect information on which aspects of the innovation are most effective in  
30 which circumstances. Possibly, the innovation and future implementation can be improved with this  
31 information. Next to highly valuable data for effective and efficient network-based care for chronic  
32 conditions in older populations, starting with dementia care, this study may yield important  
33 methodological data on the value of a multiple case study analysis for other complex interventions as  
34 well.  
35  
36

### 37 **Footnotes**

#### 38 Funding

39 This work is supported by Alzheimer Nederland (project number WE.09-2013-04) and Gieskes-Strijbis  
40 Fonds.  
41  
42

#### 43 Conflict of interest

44 All authors declare no conflict of interest.  
45  
46

#### 47 Contributions

48 AR, MN, MP, MOR, RM and MvdM were involved in the design and planning of the study. AR and  
49 MvdM drafted the manuscript. MN, MP, MOR and RM edited and revised this manuscript. All authors  
50 agreed with the final version.  
51

#### 52 Ethics approval

53 The study protocol was submitted for review to the medical ethics committee region Arnhem-  
54 Nijmegen, and they declared that formal judgment was not required (protocol number: 2015-2053).  
55  
56  
57  
58  
59  
60

1  
2  
3 **Figure 1: Overview of data collection for the evaluation of the DementiaNet innovation**  
4

5  
6 [fig 1]  
7

8  
9 *§: continuous collection of data; †: data collected at start and after 12 and 24 months; ‡: data*  
10 *collected at one time point in a selected number of networks*

11 References for the informal caregiver outcome instruments: <sup>37-46</sup>.  
12  
13

14  
15  
16  
17  
18  
19  
20  
21  
22  
23  
24  
25  
26  
27  
28  
29  
30  
31  
32  
33  
34  
35  
36  
37  
38  
39  
40  
41  
42  
43  
44  
45  
46  
47  
48  
49  
50  
51  
52  
53  
54  
55  
56  
57  
58  
59  
60

For peer review only

**Box 1: Usual primary dementia care and DementiaNet care****Usual care for dementia patients in the Netherlands:**

Dementia care in the Netherlands is characterised by practice variation among regions. The most important characteristics and common shortcomings are:

- key players in primary dementia care are general practitioners, practice nurses, case managers, district nurses;
- originally focused on acute episodes of single diseases instead of chronic multimorbidity patients;
- care is fragmented with professional working in their own domain, with limited interprofessional communication and ad hoc collaboration;
- many professionals do not know each other, are unfamiliar with each others' disciplines, responsibilities and competencies;
- there is little adherence to guidelines;
- knowledge about dementia diagnosis and management is often insufficient.

**Care with the DementiaNet innovation:**

The DementiaNet innovation aims to promote a shift, addressing these limitations, towards integrated dementia care through:

- network-based care with high levels of collaboration;
- a network leader to stimulate and coordinate the network;
- care improvement through quality improvement cycles with tailor-made goals and improvement plan to fit the situation of each individual network;
- high dementia-specific expertise through interprofessional training and practice-based learning.

**References:**

1. Adams WL, McIlvain HE, Lacy NL, et al. Primary care for elderly people: why do doctors find it so hard? *The Gerontologist* 2002;**42**(6):835-42.
2. Bergman H, Beland F, Lebel P, et al. Care for Canada's frail elderly population: fragmentation or integration? *Canadian Medical Association journal* 1997;**157**(8):1116-21.
3. Stange KC. The problem of fragmentation and the need for integrative solutions. *Annals of family medicine* 2009;**7**(2):100-3.
4. Holman H, Lorig K. Patient self-management: a key to effectiveness and efficiency in care of chronic disease. *Public health reports (Washington, DC : 1974)* 2004;**119**(3):239-43.
5. MacNeil Vroomen J, Van Mierlo LD, van de Ven PM, et al. Comparing Dutch case management care models for people with dementia and their caregivers: The design of the COMPAS study. *BMC health services research* 2012;**12**:132.
6. Goodwin N. How should integrated care address the challenge of people with complex health and social care needs? Emerging lessons from international case studies. *International journal of integrated care* 2015;**15**:e037.
7. Perry M, Draskovic I, Lucassen P, et al. Effects of educational interventions on primary dementia care: A systematic review. *International journal of geriatric psychiatry* 2011;**26**(1):1-11.
8. Peeters JM, Pot AM, de Lange J, et al. Does the organisational model of dementia case management make a difference in satisfaction with case management and caregiver burden? An evaluation study. *BMC geriatrics* 2016;**16**:65.
9. Iliffe S, Wilcock J. The UK experience of promoting dementia recognition and management in primary care. *Z Gerontol Geriatr* 2017.
10. Iliffe S, Waugh A, Poole M, et al. The effectiveness of collaborative care for people with memory problems in primary care: results of the CAREDEM case management modelling and feasibility study. *Health technology assessment (Winchester, England)* 2014;**18**(52):1-148.
11. Hebert R, Raiche M, Dubois MF, et al. Impact of PRISMA, a coordination-type integrated service delivery system for frail older people in Quebec (Canada): A quasi-experimental study. *The journals of gerontology Series B, Psychological sciences and social sciences* 2010;**65b**(1):107-18.
12. Thyrian JR, Eichler T, Pooch A, et al. Systematic, early identification of dementia and dementia care management are highly appreciated by general physicians in primary care - results within a cluster-randomized-controlled trial (DelpHi). *Journal of multidisciplinary healthcare* 2016;**9**:183-90.
13. Pawson R, Greenhalgh T, Harvey G, et al. Realist review--a new method of systematic review designed for complex policy interventions. *Journal of health services research & policy* 2005;**10 Suppl 1**:21-34.
14. Parchman ML, Noel PH, Culler SD, et al. A randomized trial of practice facilitation to improve the delivery of chronic illness care in primary care: initial and sustained effects. *Implementation science : IS* 2013;**8**:93.
15. Brown BB, Patel C, McInnes E, et al. The effectiveness of clinical networks in improving quality of care and patient outcomes: a systematic review of quantitative and qualitative studies. *BMC health services research* 2016;**16**:360.
16. Hawe P, Shiell A, Riley T. Complex interventions: how "out of control" can a randomised controlled trial be? *BMJ (Clinical research ed)* 2004;**328**(7455):1561-3.
17. Nieuwboer MS, Richters A, van der Marck MA. Triple aim improvement for individuals, services and society in dementia care: the DementiaNet collaborative care approach. *Zeitschrift für Gerontologie und Geriatrie* 2017.
18. Yin RK. Enhancing the quality of case studies in health services research. *Health services research* 1999;**34**(5 Pt 2):1209-24.
19. Heinemann GD, Schmitt MH, Farrell MP, et al. Development of an Attitudes Toward Health Care Teams Scale. *Evaluation & the health professions* 1999;**22**(1):123-42.

20. Turner S, Iliffe S, Downs M, et al. General practitioners' knowledge, confidence and attitudes in the diagnosis and management of dementia. *Age and ageing* 2004;**33**(5):461-7.
21. Hyer K, Heinemann GD, Fulmer T. *Team Skills Scale. Team Performance in Health Care: Assessment and Development*. New York: Plenum, 2002:159-63.
22. D'Amour D, Goulet L, Labadie JF, et al. A model and typology of collaboration between professionals in healthcare organizations. *BMC health services research* 2008;**8**:188.
23. Valentijn PP, Vrijhoef HJ, Ruwaard D, et al. Towards an international taxonomy of integrated primary care: a Delphi consensus approach. *BMC family practice* 2015;**16**:64.
24. Hebert R, Veil A. Monitoring the degree of implementation of an integrated delivery system. *International journal of integrated care* 2004;**4**:e05.
25. Macleod MR, Michie S, Roberts I, et al. Biomedical research: increasing value, reducing waste. *Lancet (London, England)* 2014;**383**(9912):101-4.
26. Ioannidis JP, Greenland S, Hlatky MA, et al. Increasing value and reducing waste in research design, conduct, and analysis. *Lancet (London, England)* 2014;**383**(9912):166-75.
27. Greenhalgh T, Howick J, Maskrey N. Evidence based medicine: a movement in crisis? *BMJ (Clinical research ed)* 2014;**348**:g3725.
28. Craig P, Dieppe P, Macintyre S, et al. Developing and evaluating complex interventions: the new Medical Research Council guidance. *International journal of nursing studies* 2013;**50**(5):587-92.
29. Snowden DJ, Boone ME. A leader's framework for decision making. *A leader's framework for decision making. Harv Bus Rev* 2007;**85**(11):68-76, 149.
30. Leykum LK, Lanham HJ, Pugh JA, et al. Manifestations and implications of uncertainty for improving healthcare systems: an analysis of observational and interventional studies grounded in complexity science. *Implementation science : IS* 2014;**9**:165.
31. Lamont T, Barber N, Pury J, et al. New approaches to evaluating complex health and care systems. *BMJ (Clinical research ed)* 2016;**352**:i154.
32. Timbie JW, Fox DS, Van Busum K, et al. Five reasons that many comparative effectiveness studies fail to change patient care and clinical practice. *Health affairs (Project Hope)* 2012;**31**(10):2168-75.
33. Roland M, Abel G. Reducing emergency admissions: are we on the right track? *BMJ (Clinical research ed)* 2012;**345**:e6017.
34. Walach H, Falkenberg T, Fonnebo V, et al. Circular instead of hierarchical: methodological principles for the evaluation of complex interventions. *BMC medical research methodology* 2006;**6**:29.
35. Craig P, Dieppe P, Macintyre S, et al. Developing and evaluating complex interventions: the new Medical Research Council guidance. *BMJ (Clinical research ed)* 2008;**337**:a1655.
36. Yin RK. *Applications of case study research*. 3rd edition ed: SAGE Publications, Inc. , 2012.
37. Scholzel-Dorenbos CJ, Arons AM, Wammes JJ, et al. Validation study of the prototype of a disease-specific index measure for health-related quality of life in dementia. *Health and quality of life outcomes* 2012;**10**:118.
38. Makai P, Koopmanschap MA, Brouwer WB, et al. A validation of the ICECAP-O in a population of post-hospitalized older people in the Netherlands. *Health and quality of life outcomes* 2013;**11**:57.
39. Gagnon M, Hebert R, Dube M, et al. Development and validation of the Health Care Satisfaction Questionnaire (HCSQ) in elders. *Journal of nursing measurement* 2006;**14**(3):190-204.
40. Gagnon M, Hibert R, Dube M, et al. Development and validation of an instrument measuring individual empowerment in relation to personal health care: the Health Care Empowerment Questionnaire (HCEQ). *American journal of health promotion : AJHP* 2006;**20**(6):429-35.
41. de Jonghe JF, Kat MG, Kalisvaart CJ, et al. [Neuropsychiatric inventory questionnaire (NPI-Q): A validity study of the Dutch form]. *Tijdschrift voor gerontologie en geriatrie* 2003;**34**(2):74-7.
42. Brouwer WB, van Exel NJ, van Gorp B, et al. The CarerQol instrument: a new instrument to measure care-related quality of life of informal caregivers for use in economic evaluations.

- 1  
2  
3 Quality of life research : an international journal of quality of life aspects of treatment, care  
4 and rehabilitation 2006;**15**(6):1005-21.
- 5 43. Hoefman RJ, van Exel J, Rose JM, et al. A discrete choice experiment to obtain a tariff for valuing  
6 informal care situations measured with the CarerQol instrument. Medical decision making :  
7 an international journal of the Society for Medical Decision Making 2014;**34**(1):84-96.
- 8 44. Kraijo H, van Exel J, Brouwer W. The perseverance time of informal carers for people with  
9 dementia: results of a two-year longitudinal follow-up study. BMC nursing 2015;**14**:56.
- 10 45. Richters A, Olde Rikkert MG, van Exel NJ, et al. Perseverance Time of Informal Caregivers for  
11 Institutionalized Elderly: Construct Validity and Test-Retest Reliability of a Single-Question  
12 Instrument. Journal of the American Medical Directors Association 2016;**17**(8):761-2.
- 13 46. Richters A, Melis RJ, Olde Rikkert MG, et al. The International Dementia Alliance Instrument for  
14 Feasible and Valid Staging of Individuals with Dementia by Informal Caregivers. Journal of the  
15 American Geriatrics Society 2016.
- 16  
17  
18  
19  
20  
21  
22  
23  
24  
25  
26  
27  
28  
29  
30  
31  
32  
33  
34  
35  
36  
37  
38  
39  
40  
41  
42  
43  
44  
45  
46  
47  
48  
49  
50  
51  
52  
53  
54  
55  
56  
57  
58  
59  
60

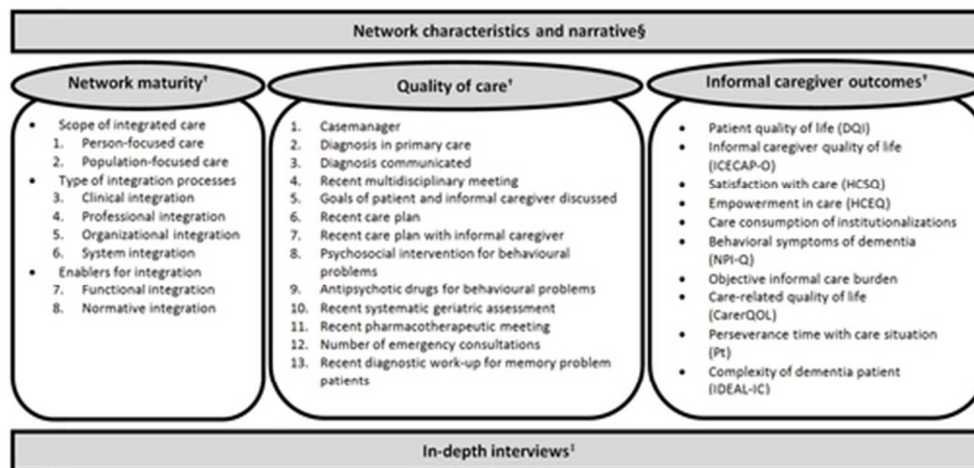

Caption:

Overview of data collection for the evaluation of the DementiaNet innovation

Legend:

§: continuous collection of data; †: data collected at start and after 12 and 24 months; ‡: data collected at one time point in a selected number of networks

References for the informal caregiver outcome instruments: 37-46.

43x21mm (300 x 300 DPI)
